# Supplementary material for: Evaluating the Contribution of North American Zoos and Aquariums to Endangered Species Recovery
Source: PubMed Central journal article supplement (PMC6023936; doi:10.1038/s41598-018-27806-2), 2018-06-28
Supplement: 41598_2018_27806_MOESM1_ESM.pdf [file 41598_2018_27806_MOESM1_ESM.pdf]

# Evaluating the Contribution of North American Zoos and Aquariums to Endangered Species Recovery

Judy P. Che-Castaldo, Shelly A. Grow, and Lisa J. Faust

## Supplementary Information

Table S1. Complete list of zoos and aquariums that were listed as the responsible party for at least one recovery action in recovery plans for species listed under the U.S. Endangered Species Act as of September 2016. Italicized names do not identify a specific institution to our knowledge. Each institution is listed as it was identified in the recovery plan, and thus may not reflect its official or current institutional name.

---

### Zoo Institution

---

Association of Zoos & Aquariums (formerly American Association of Zoological Parks and Aquariums), or “Species Survival Plan® (SSP) program partners”

Arizona-Sonora Desert Museum

Boise Zoo

Burnet Park Zoo (Rosamond Gifford Zoo)

Cabrillo Aquarium

Chicago Zoological Society

Cincinnati Zoo and Botanical Garden

Columbus Zoo

Dallas Aquarium

Detroit Zoo

*Florida Aquaria*

Fort Worth Zoo

Gladys Porter Zoo

Honolulu Zoo

Living Seas

Long Beach Aquarium of the Pacific

Los Angeles Zoo

Lowry Park Zoo

Memphis Zoo

Miami Seaquarium

Monterey Bay Aquarium

Mote Marine Laboratory

New England Aquarium

Oregon Zoo

Phoenix Zoo

Point Defiance Zoo

Roger Williams Park Zoo

San Diego Wild Animal Park

San Diego Zoo Safari Park

---

---

San Diego Zoological Society  
Santa Barbara Zoo  
Sea World Florida & California  
Seattle Aquarium  
South Florida Museum  
Tennessee Aquarium Research Institute  
Toledo Zoo  
*USFWS Aquaria*  
Vancouver Aquarium  
Wildlife Conservation Park/Bronx Zoo  
*Zoological Park*

---

Table S2. Recovery plan data accessed from the USFWS Recovery Plan Ad Hoc Report database (<http://ecos.fws.gov/ecp0/ore-input/ad-hoc-recovery-actions-public-report-input>) in September 2016, consisting of information for all plans that contain recovery actions listing a zoo, aquarium, or Association of Zoos & Aquariums (AZA) as the responsible party.

(in separate .csv file)
